# Supplementary material
Source: PubMed Central journal article supplement (PMC3960453)
Supplement: ajcr0004-0161-f7.pdf [file ajcr0004-0161-f7.pdf]

### Western blots, tumor

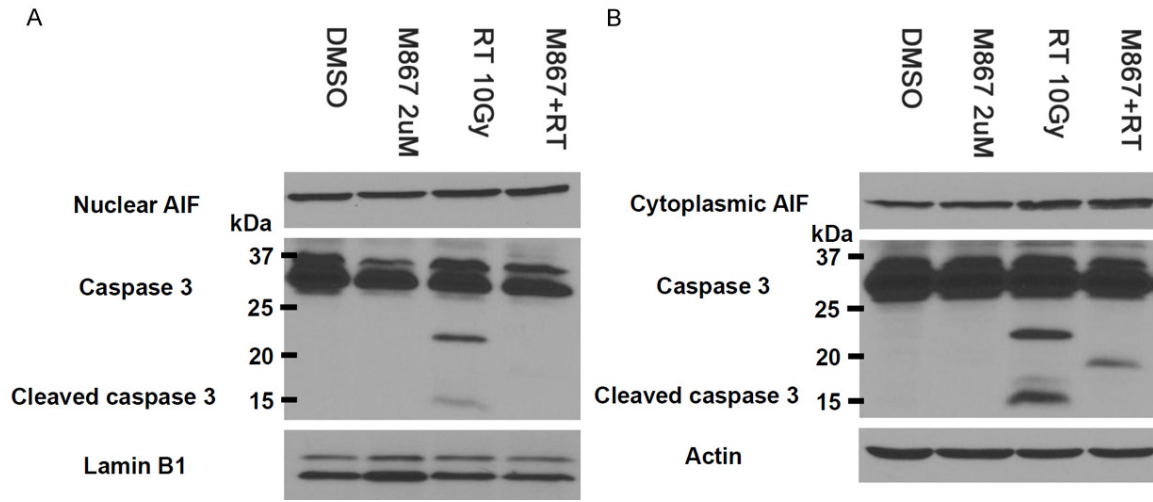

**Supplemental Figure 1.** *AIF Mediates M867 Enhancement of Radiation Induced Apoptosis.* (A and B) H460-Luc2 cell cultures were separated into four groups and given the following treatments: DMSO, 2 µM M867, 2Gy RT or M867 and RT for 48 hours. Equal amounts of protein were loaded and run on 12% SDS-PAGE gel. Western blots detected AIF in the cytoplasm and nucleus. Actin (A) and Lamin B1 (B) were the loading controls.
